# Supplementary material for: Identification and Comparative Analysis of ncRNAs in Human, Mouse and Zebrafish Indicate a Conserved Role in Regulation of Genes Expressed in Brain
Source: PLoS One. 2012 Dec 20;7(12):e52275. doi: 10.1371/journal.pone.0052275 (PMC3527520; doi:10.1371/journal.pone.0052275)
Supplement: Table S3 — Annotation of common protein-coding genes with proximate intergenic ncRNAs (<5 kb) in human, mouse and zebrafish. Sheet 1 in this excel table shows 12 conserved genes with ncRNAs at the 5′ end and sheet 2 shows 96 conserved genes with ncRNAs at the 3′ end. (XLSX) [file pone.0052275.s011.xlsx]

## Sheet: 5' END
GI	OFFICIAL_GENE_SYMBOL	Related ncRNAs	Expression in human brain (Based on GeneCards V3)	OMIM_DISEASE	DISEASES_Disorders (Based on GeneCards V3)	Gene Name	Species	CYTOBAND	GOTERM_BP_3	GOTERM_CC_3	GOTERM_MF_3
24497518	MAN1A1,		Yes		mannosidase deficiency disease	mannosidase, alpha, class 1A, member 1	Homo sapiens	6q22,		GO:0000139~Golgi membrane,GO:0000267~cell fraction,GO:0005622~intracellular,GO:0005626~insoluble fraction,GO:0005737~cytoplasm,GO:0012505~endomembrane system,GO:0016020~membrane,GO:0031090~organelle membrane,GO:0031224~intrinsic to membrane,GO:0043229~intracellular organelle,GO:0043231~intracellular membrane-bounded organelle,GO:0044424~intracellular part,GO:0044425~membrane part,GO:0044431~Golgi…	GO:0016798~hydrolase activity, acting on glycosyl bonds,GO:0043169~cation binding,
46852167	MAN1A2,		Yes			mannosidase, alpha, class 1A, member 2	Homo sapiens	1p13,	GO:0005975~carbohydrate metabolic process,GO:0009059~macromolecule biosynthetic process,GO:0019538~protein metabolic process,GO:0035295~tube development,GO:0044249~cellular biosynthetic process,GO:0044260~cellular macromolecule metabolic process,GO:0044262~cellular carbohydrate metabolic process,GO:0048286~lung alveolus development,GO:0048513~organ development,GO:0048731~system development,	GO:0000139~Golgi membrane,GO:0000267~cell fraction,GO:0005622~intracellular,GO:0005626~insoluble fraction,GO:0005737~cytoplasm,GO:0012505~endomembrane system,GO:0016020~membrane,GO:0031090~organelle membrane,GO:0031224~intrinsic to membrane,GO:0043229~intracellular organelle,GO:0043231~intracellular membrane-bounded organelle,GO:0044424~intracellular part,GO:0044425~membrane part,GO:0044431~Golgi…	GO:0016798~hydrolase activity, acting on glycosyl bonds,GO:0043169~cation binding,
119220563	ONECUT2,	Target of miR-9	Yes		oral cancer	one cut homeobox 2	Homo sapiens	18q21.1-q21.2,	GO:0000902~cell morphogenesis,GO:0006139~nucleobase, nucleoside, nucleotide and nucleic acid metabolic process,GO:0009059~macromolecule biosynthetic process,GO:0009653~anatomical structure morphogenesis,GO:0009887~organ morphogenesis,GO:0009888~tissue development,GO:0009889~regulation of biosynthetic process,GO:0009891~positive regulation of biosynthetic process,GO:0009893~positive regulation of …	GO:0005622~intracellular,GO:0043229~intracellular organelle,GO:0043231~intracellular membrane-bounded organelle,GO:0044424~intracellular part,	GO:0003677~DNA binding,
85838514	PANK2,	Host of miR-103	Yes	HARP syndrome,Neurodegeneration with brain iron accumulation 1 (Hallervorden-Spatz syndrome),Neurodegeneration, pantothenate kinase-associated,	Hallervorden-Spatz syndrome |dementia |dystonia	pantothenate kinase 2	Homo sapiens	20p13,	GO:0006139~nucleobase, nucleoside, nucleotide and nucleic acid metabolic process,GO:0034641~cellular nitrogen compound metabolic process,GO:0044249~cellular biosynthetic process,GO:0051186~cofactor metabolic process,	GO:0005622~intracellular,GO:0005737~cytoplasm,GO:0043229~intracellular organelle,GO:0043231~intracellular membrane-bounded organelle,GO:0044424~intracellular part,GO:0044444~cytoplasmic part,	GO:0001883~purine nucleoside binding,GO:0016772~transferase activity, transferring phosphorus-containing groups,GO:0017076~purine nucleotide binding,GO:0032553~ribonucleotide binding,
23110983	KCNJ4,		Yes			potassium inwardly-rectifying channel, subfamily J, member 4	Homo sapiens	22q13.1,	GO:0006810~transport,GO:0006811~ion transport,	GO:0005886~plasma membrane,GO:0016020~membrane,GO:0031224~intrinsic to membrane,GO:0034702~ion channel complex,GO:0042995~cell projection,GO:0043005~neuron projection,GO:0043025~cell soma,GO:0044425~membrane part,GO:0044459~plasma membrane part,	GO:0022803~passive transmembrane transporter activity,GO:0022891~substrate-specific transmembrane transporter activity,GO:0043169~cation binding,
241982778	PDCD6IP,	Target of miR-1225-5P	Yes			programmed cell death 6 interacting protein	Homo sapiens	3p22.3,	GO:0006810~transport,GO:0008104~protein localization,GO:0012501~programmed cell death,GO:0015031~protein transport,GO:0045184~establishment of protein localization,	GO:0005622~intracellular,GO:0005737~cytoplasm,GO:0031410~cytoplasmic vesicle,GO:0031988~membrane-bounded vesicle,GO:0043229~intracellular organelle,GO:0043231~intracellular membrane-bounded organelle,GO:0043232~intracellular non-membrane-bounded organelle,GO:0044424~intracellular part,GO:0044430~cytoskeletal part,GO:0044444~cytoplasmic part,GO:0044446~intracellular organelle part,	GO:0048306~calcium-dependent protein binding,
156071512	SNX14,		Yes			sorting nexin 14	Homo sapiens	6q14.3,	GO:0006810~transport,GO:0008104~protein localization,GO:0015031~protein transport,GO:0045184~establishment of protein localization,	GO:0016020~membrane,GO:0031224~intrinsic to membrane,GO:0044425~membrane part,	GO:0005543~phospholipid binding,
214829951	tubb2b,		Yes		lissencephaly	tubulin, beta 2B	Homo sapiens	6p25,	GO:0000278~mitotic cell cycle,GO:0006461~protein complex assembly,GO:0007018~microtubule-based movement,GO:0022402~cell cycle process,GO:0022403~cell cycle phase,GO:0030154~cell differentiation,GO:0034621~cellular macromolecular complex subunit organization,GO:0034622~cellular macromolecular complex assembly,GO:0048285~organelle fission,GO:0048731~system development,GO:0065003~macromolecular comp…	GO:0005622~intracellular,GO:0043229~intracellular organelle,GO:0043232~intracellular non-membrane-bounded organelle,GO:0044424~intracellular part,GO:0044430~cytoskeletal part,GO:0044446~intracellular organelle part,	GO:0016817~hydrolase activity, acting on acid anhydrides,GO:0017076~purine nucleotide binding,GO:0032553~ribonucleotide binding,
183396765	znf41,		Yes	Mental retardation, X-linked-89,	Aland Island eye disease |mental disorder |intellectual disability	zinc finger protein 41	Homo sapiens	Xp11.23,	GO:0006139~nucleobase, nucleoside, nucleotide and nucleic acid metabolic process,GO:0009059~macromolecule biosynthetic process,GO:0009889~regulation of biosynthetic process,GO:0010467~gene expression,GO:0019222~regulation of metabolic process,GO:0031323~regulation of cellular metabolic process,GO:0034641~cellular nitrogen compound metabolic process,GO:0044249~cellular biosynthetic process,GO:0044…	GO:0005622~intracellular,GO:0043229~intracellular organelle,GO:0043231~intracellular membrane-bounded organelle,GO:0044424~intracellular part,	GO:0003677~DNA binding,GO:0043169~cation binding,
141801607	ZNF595,		Yes			zinc finger protein 595	Homo sapiens	4p16.3,	GO:0006139~nucleobase, nucleoside, nucleotide and nucleic acid metabolic process,GO:0009059~macromolecule biosynthetic process,GO:0009889~regulation of biosynthetic process,GO:0010467~gene expression,GO:0019222~regulation of metabolic process,GO:0031323~regulation of cellular metabolic process,GO:0034641~cellular nitrogen compound metabolic process,GO:0044249~cellular biosynthetic process,GO:0044…	GO:0005622~intracellular,GO:0043229~intracellular organelle,GO:0043231~intracellular membrane-bounded organelle,GO:0044424~intracellular part,	GO:0003677~DNA binding,GO:0043169~cation binding,
111548667	ZNF676,		Yes			zinc finger protein 676	Homo sapiens	19p12,	GO:0006139~nucleobase, nucleoside, nucleotide and nucleic acid metabolic process,GO:0009059~macromolecule biosynthetic process,GO:0009889~regulation of biosynthetic process,GO:0010467~gene expression,GO:0019222~regulation of metabolic process,GO:0031323~regulation of cellular metabolic process,GO:0034641~cellular nitrogen compound metabolic process,GO:0044249~cellular biosynthetic process,GO:0044…	GO:0005622~intracellular,GO:0043229~intracellular organelle,GO:0043231~intracellular membrane-bounded organelle,GO:0044424~intracellular part,	GO:0003677~DNA binding,GO:0043169~cation binding,
209954794	ZNF761,		No			zinc finger protein 761	Homo sapiens	19q13.41,	GO:0006139~nucleobase, nucleoside, nucleotide and nucleic acid metabolic process,GO:0009059~macromolecule biosynthetic process,GO:0009889~regulation of biosynthetic process,GO:0010467~gene expression,GO:0019222~regulation of metabolic process,GO:0031323~regulation of cellular metabolic process,GO:0034641~cellular nitrogen compound metabolic process,GO:0044249~cellular biosynthetic process,GO:0044…	GO:0005622~intracellular,GO:0043229~intracellular organelle,GO:0043231~intracellular membrane-bounded organelle,GO:0044424~intracellular part,	GO:0003677~DNA binding,GO:0043169~cation binding,

## Sheet: 3' END
Table S3 Human genes conserved in mouse and zebrafish with proximate intergenic ncRNAs at their 3’ end (< 5 kb).
GI	OFFICIAL_GENE_SYMBOL	Related ncRNAs	Expression in human brain (Based on GeneCards V3)	OMIM_DISEASE	DISEASES_Disorders (Based on GeneCards V3)	Gene Name	Species	CYTOBAND	GOTERM_BP_3	GOTERM_CC_3	GOTERM_MF_3
284413706	AMMECR1,		Yes	Alport syndrome, mental retardation, midface hypoplasia, and elliptocytosis,	Alport syndrome |intellectual disability	Alport syndrome, mental retardation, midface hypoplasia and elliptocytosis chromosomal region gene 1	Homo sapiens	Xq22.3,
111118979	ephb2,		Yes	Prostate cancer, progression and metastasis of,	colorectal cancer |Parkinson's disease |pathological gambling	EPH receptor B2	Homo sapiens	1p36.1-p35,	GO:0000902~cell morphogenesis,GO:0006793~phosphorus metabolic process,GO:0006928~cell motion,GO:0007411~axon guidance,GO:0007611~learning or memory,GO:0009653~anatomical structure morphogenesis,GO:0009887~organ morphogenesis,GO:0010646~regulation of cell communication,GO:0019538~protein metabolic process,GO:0021602~cranial nerve morphogenesis,GO:0021675~nerve development,GO:0022603~regulation of …	GO:0005886~plasma membrane,GO:0016020~membrane,GO:0031224~intrinsic to membrane,GO:0043025~cell soma,GO:0044425~membrane part,GO:0044459~plasma membrane part,	GO:0001883~purine nucleoside binding,GO:0004872~receptor activity,GO:0005102~receptor binding,GO:0016772~transferase activity, transferring phosphorus-containing groups,GO:0017076~purine nucleotide binding,GO:0032553~ribonucleotide binding,
190194354	kiaa1524,		Yes			KIAA1524	Homo sapiens	3q13.13,		GO:0005622~intracellular,GO:0005737~cytoplasm,GO:0016020~membrane,GO:0031224~intrinsic to membrane,GO:0044424~intracellular part,GO:0044425~membrane part,
205360976	LASS4,		No			LAG1 homolog, ceramide synthase 4	Homo sapiens	19p13.2,	GO:0006629~lipid metabolic process,GO:0008610~lipid biosynthetic process,GO:0009889~regulation of biosynthetic process,GO:0019222~regulation of metabolic process,GO:0031323~regulation of cellular metabolic process,GO:0044249~cellular biosynthetic process,GO:0044255~cellular lipid metabolic process,GO:0050794~regulation of cellular process,GO:0051171~regulation of nitrogen compound metabolic proce…	GO:0005622~intracellular,GO:0005737~cytoplasm,GO:0016020~membrane,GO:0031224~intrinsic to membrane,GO:0043229~intracellular organelle,GO:0043231~intracellular membrane-bounded organelle,GO:0044424~intracellular part,GO:0044425~membrane part,GO:0044444~cytoplasmic part,	GO:0003677~DNA binding,GO:0016746~transferase activity, transferring acyl groups,
118442844	ASAH2B,		Yes			N-acylsphingosine amidohydrolase (non-lysosomal ceramidase) 2B	Homo sapiens	10q11.21,10q11.22,10q11.23,	GO:0006629~lipid metabolic process,GO:0007165~signal transduction,GO:0010033~response to organic substance,GO:0012501~programmed cell death,GO:0044255~cellular lipid metabolic process,GO:0050794~regulation of cellular process,	GO:0000267~cell fraction,GO:0005622~intracellular,GO:0005626~insoluble fraction,GO:0005737~cytoplasm,GO:0005886~plasma membrane,GO:0016020~membrane,GO:0031224~intrinsic to membrane,GO:0043229~intracellular organelle,GO:0043231~intracellular membrane-bounded organelle,GO:0044424~intracellular part,GO:0044425~membrane part,GO:0044444~cytoplasmic part,	GO:0016810~hydrolase activity, acting on carbon-nitrogen (but not peptide) bonds,
12007649	NDST4,		Yes			N-deacetylase/N-sulfotransferase (heparan glucosaminyl) 4	Homo sapiens	4q25-q26,		GO:0005622~intracellular,GO:0005737~cytoplasm,GO:0016020~membrane,GO:0031224~intrinsic to membrane,GO:0043229~intracellular organelle,GO:0043231~intracellular membrane-bounded organelle,GO:0044424~intracellular part,GO:0044425~membrane part,GO:0044444~cytoplasmic part,	GO:0016782~transferase activity, transferring sulfur-containing groups,
62460632	rbm16,		Yes			RNA binding motif protein 16	Homo sapiens	6q25.1-q25.3,	GO:0006139~nucleobase, nucleoside, nucleotide and nucleic acid metabolic process,GO:0009059~macromolecule biosynthetic process,GO:0010467~gene expression,GO:0034641~cellular nitrogen compound metabolic process,GO:0044249~cellular biosynthetic process,GO:0044260~cellular macromolecule metabolic process,	GO:0005622~intracellular,GO:0043229~intracellular organelle,GO:0043231~intracellular membrane-bounded organelle,GO:0044424~intracellular part,	GO:0003723~RNA binding,GO:0019904~protein domain specific binding,
40217816	SLITRK1,	Potential target of miR-189	Yes	Tourette syndrome,	Gilles de la Tourette syndrome |obsessive-compulsive disease |trichotillomania |Wilson disease |chronic lymphocytic leukemia	SLIT and NTRK-like family, member 1	Homo sapiens	13q31.1,	GO:0000902~cell morphogenesis,GO:0009653~anatomical structure morphogenesis,GO:0030154~cell differentiation,GO:0031175~neuron projection development,GO:0032989~cellular component morphogenesis,GO:0032990~cell part morphogenesis,GO:0048468~cell development,GO:0048731~system development,GO:0048858~cell projection morphogenesis,	GO:0016020~membrane,GO:0031224~intrinsic to membrane,GO:0044425~membrane part,
209693425	SMAD2,	Control DROSHA-mediated microRNA maturation	Yes		cancer |pulmonary fibrosis |ureteral obstruction	SMAD family member 2	Homo sapiens	18q21.1,	GO:0001704~formation of primary germ layer,GO:0003002~regionalization,GO:0006139~nucleobase, nucleoside, nucleotide and nucleic acid metabolic process,GO:0006461~protein complex assembly,GO:0006793~phosphorus metabolic process,GO:0006810~transport,GO:0007165~signal transduction,GO:0007267~cell-cell signaling,GO:0007389~pattern specification process,GO:0008285~negative regulation of cell prolifera…	GO:0005622~intracellular,GO:0005667~transcription factor complex,GO:0005737~cytoplasm,GO:0043229~intracellular organelle,GO:0043231~intracellular membrane-bounded organelle,GO:0043233~organelle lumen,GO:0044424~intracellular part,GO:0044428~nuclear part,GO:0044444~cytoplasmic part,GO:0044446~intracellular organelle part,GO:0070013~intracellular organelle lumen,	GO:0003677~DNA binding,GO:0005102~receptor binding,GO:0008134~transcription factor binding,GO:0019899~enzyme binding,GO:0046332~SMAD binding,
194097349	actn1,	With antisense transcript ACTN1-AS1	Yes			actinin, alpha 1	Homo sapiens	14q24.1-q24.2,14q24.1-q24.2|14q24|14q22-q24,	GO:0007010~cytoskeleton organization,GO:0010941~regulation of cell death,GO:0030036~actin cytoskeleton organization,GO:0031589~cell-substrate adhesion,GO:0032879~regulation of localization,GO:0034329~cell junction assembly,GO:0048519~negative regulation of biological process,GO:0048523~negative regulation of cellular process,GO:0050794~regulation of cellular process,GO:0051017~actin filament bund…	GO:0005622~intracellular,GO:0005737~cytoplasm,GO:0005886~plasma membrane,GO:0016020~membrane,GO:0031143~pseudopodium,GO:0031410~cytoplasmic vesicle,GO:0031983~vesicle lumen,GO:0031988~membrane-bounded vesicle,GO:0042995~cell projection,GO:0043229~intracellular organelle,GO:0043231~intracellular membrane-bounded organelle,GO:0043232~intracellular non-membrane-bounded organelle,GO:0043233~organelle…	GO:0005102~receptor binding,GO:0008092~cytoskeletal protein binding,GO:0032403~protein complex binding,GO:0043169~cation binding,
62912452	ADD3,		Yes		Alzheimer's disease |twin-to-twin transfusion syndrome	adducin 3 (gamma)	Homo sapiens	10q24.2-q24.3,		GO:0005622~intracellular,GO:0005737~cytoplasm,GO:0005886~plasma membrane,GO:0016020~membrane,GO:0043229~intracellular organelle,GO:0043231~intracellular membrane-bounded organelle,GO:0043232~intracellular non-membrane-bounded organelle,GO:0044424~intracellular part,GO:0044425~membrane part,GO:0044428~nuclear part,GO:0044444~cytoplasmic part,GO:0044446~intracellular organelle part,GO:0044459~plasm…	GO:0005516~calmodulin binding,GO:0008092~cytoskeletal protein binding,GO:0019899~enzyme binding,GO:0043169~cation binding,
51093829	BICD1,		Yes	Genome-wide association analysis of susceptibility and clinical phenotype in multiple sclerosis,		bicaudal D homolog 1 (Drosophila)	Homo sapiens	12p11.2-p11.1,	GO:0006139~nucleobase, nucleoside, nucleotide and nucleic acid metabolic process,GO:0006403~RNA localization,GO:0006810~transport,GO:0009653~anatomical structure morphogenesis,GO:0010467~gene expression,GO:0034641~cellular nitrogen compound metabolic process,GO:0044260~cellular macromolecule metabolic process,GO:0070727~cellular macromolecule localization,	GO:0005622~intracellular,GO:0005737~cytoplasm,GO:0043229~intracellular organelle,GO:0043231~intracellular membrane-bounded organelle,GO:0043232~intracellular non-membrane-bounded organelle,GO:0044424~intracellular part,GO:0044444~cytoplasmic part,
7656927	Bmp10,		Yes		ventricular septal defect |hereditary hemorrhagic telangiectasia	bone morphogenetic protein 10	Homo sapiens	2p14,	GO:0001558~regulation of cell growth,GO:0006793~phosphorus metabolic process,GO:0007010~cytoskeleton organization,GO:0008284~positive regulation of cell proliferation,GO:0008361~regulation of cell size,GO:0009653~anatomical structure morphogenesis,GO:0009887~organ morphogenesis,GO:0009888~tissue development,GO:0009889~regulation of biosynthetic process,GO:0009891~positive regulation of biosynthet…	GO:0005615~extracellular space,GO:0005622~intracellular,GO:0005737~cytoplasm,GO:0009986~cell surface,GO:0044424~intracellular part,GO:0044444~cytoplasmic part,	GO:0005102~receptor binding,
266454878	CDH18,		Yes			cadherin 18, type 2	Homo sapiens	5p15.2-p15.1,	GO:0016337~cell-cell adhesion,	GO:0005886~plasma membrane,GO:0016020~membrane,GO:0031224~intrinsic to membrane,GO:0044425~membrane part,	GO:0043169~cation binding,
55770837	Clcn3,	Target of miR-1	Yes		nephrolithiasis	chloride channel 3	Homo sapiens	4q33,	GO:0006810~transport,GO:0006811~ion transport,GO:0007032~endosome organization,GO:0042592~homeostatic process,GO:0055082~cellular chemical homeostasis,GO:0055085~transmembrane transport,	GO:0005622~intracellular,GO:0005737~cytoplasm,GO:0005886~plasma membrane,GO:0009986~cell surface,GO:0012505~endomembrane system,GO:0012506~vesicle membrane,GO:0016020~membrane,GO:0016324~apical plasma membrane,GO:0031090~organelle membrane,GO:0031224~intrinsic to membrane,GO:0031410~cytoplasmic vesicle,GO:0031988~membrane-bounded vesicle,GO:0043229~intracellular organelle,GO:0043231~intracellular…	GO:0001883~purine nucleoside binding,GO:0017076~purine nucleotide binding,GO:0019904~protein domain specific binding,GO:0022803~passive transmembrane transporter activity,GO:0022804~active transmembrane transporter activity,GO:0022891~substrate-specific transmembrane transporter activity,GO:0032553~ribonucleotide binding,GO:0042802~identical protein binding,GO:0043168~anion binding,GO:0046983~pro…
117306179	CNTNAP3,CNTNAP3B,		Yes		cyclothymic disease	contactin associated protein-like 3; contactin associated protein-like 3B	Homo sapiens	9p11.2,9p13.1,	GO:0007165~signal transduction,GO:0050794~regulation of cellular process,	GO:0005886~plasma membrane,GO:0016020~membrane,GO:0031224~intrinsic to membrane,GO:0044425~membrane part,	GO:0005102~receptor binding,
17978465	CCNT1,		Yes		Human immunodeficiency virus infectious disease |equine infectious anemia	cyclin T1	Homo sapiens	12q11-q13.3,	GO:0006139~nucleobase, nucleoside, nucleotide and nucleic acid metabolic process,GO:0006793~phosphorus metabolic process,GO:0009059~macromolecule biosynthetic process,GO:0009889~regulation of biosynthetic process,GO:0010467~gene expression,GO:0019222~regulation of metabolic process,GO:0019538~protein metabolic process,GO:0031323~regulation of cellular metabolic process,GO:0034641~cellular nitroge…	GO:0005622~intracellular,GO:0043229~intracellular organelle,GO:0043231~intracellular membrane-bounded organelle,GO:0043232~intracellular non-membrane-bounded organelle,GO:0043233~organelle lumen,GO:0044424~intracellular part,GO:0044428~nuclear part,GO:0044446~intracellular organelle part,GO:0070013~intracellular organelle lumen,	GO:0003677~DNA binding,GO:0003723~RNA binding,
62952505	CYP4A22,	With antisense transcript cyp4a22-as1	Yes			cytochrome P450, family 4, subfamily A, polypeptide 22	Homo sapiens	1p33,		GO:0000267~cell fraction,GO:0005622~intracellular,GO:0005626~insoluble fraction,GO:0005737~cytoplasm,GO:0016020~membrane,GO:0019898~extrinsic to membrane,GO:0043229~intracellular organelle,GO:0043231~intracellular membrane-bounded organelle,GO:0044424~intracellular part,GO:0044425~membrane part,GO:0044444~cytoplasmic part,	GO:0004497~monooxygenase activity,GO:0016705~oxidoreductase activity, acting on paired donors, with incorporation or reduction of molecular oxygen,GO:0020037~heme binding,GO:0043169~cation binding,
32483395	DGKI,		Yes			diacylglycerol kinase, iota	Homo sapiens	7q32.3-q33,	GO:0007165~signal transduction,GO:0019222~regulation of metabolic process,GO:0031323~regulation of cellular metabolic process,GO:0044093~positive regulation of molecular function,GO:0050790~regulation of catalytic activity,GO:0050794~regulation of cellular process,	GO:0005622~intracellular,GO:0005737~cytoplasm,GO:0043229~intracellular organelle,GO:0043231~intracellular membrane-bounded organelle,GO:0044424~intracellular part,	GO:0001883~purine nucleoside binding,GO:0016772~transferase activity, transferring phosphorus-containing groups,GO:0017076~purine nucleotide binding,GO:0032553~ribonucleotide binding,GO:0043169~cation binding,
264681497	Dok6,		Yes			docking protein 6	Homo sapiens	18q22.2,			GO:0005102~receptor binding,GO:0032403~protein complex binding,
116734670	DYRK1A,	Regulated by miR-199b and mir-1246	Yes		Down syndrome |neuroblastoma |intellectual disability	dual-specificity tyrosine-(Y)-phosphorylation regulated kinase 1A	Homo sapiens	21q22.13,	GO:0006793~phosphorus metabolic process,GO:0019538~protein metabolic process,GO:0044260~cellular macromolecule metabolic process,GO:0048731~system development,	GO:0005622~intracellular,GO:0043229~intracellular organelle,GO:0043231~intracellular membrane-bounded organelle,GO:0043233~organelle lumen,GO:0044424~intracellular part,GO:0044428~nuclear part,GO:0044446~intracellular organelle part,GO:0070013~intracellular organelle lumen,	GO:0001883~purine nucleoside binding,GO:0016772~transferase activity, transferring phosphorus-containing groups,GO:0017076~purine nucleotide binding,GO:0032553~ribonucleotide binding,GO:0043621~protein self-association,
41327737			N/A			epidermal growth factor receptor (erythroblastic leukemia viral (v-erb-b) oncogene homolog, avian)	Homo sapiens	7p12,
257467480	EIF2C2,	Responsible for miRNA cleavage activity	Yes		Patau syndrome |leukemia	eukaryotic translation initiation factor 2C, 2	Homo sapiens	8q24,	GO:0006139~nucleobase, nucleoside, nucleotide and nucleic acid metabolic process,GO:0009059~macromolecule biosynthetic process,GO:0009889~regulation of biosynthetic process,GO:0009890~negative regulation of biosynthetic process,GO:0009892~negative regulation of metabolic process,GO:0010033~response to organic substance,GO:0010467~gene expression,GO:0010605~negative regulation of macromolecule met…	GO:0000932~cytoplasmic mRNA processing body,GO:0005622~intracellular,GO:0005737~cytoplasm,GO:0005845~mRNA cap binding complex,GO:0030529~ribonucleoprotein complex,GO:0031332~RNAi effector complex,GO:0034518~RNA cap binding complex,GO:0035068~micro-ribonucleoprotein complex,GO:0043229~intracellular organelle,GO:0043231~intracellular membrane-bounded organelle,GO:0044424~intracellular part,GO:00444…	GO:0003723~RNA binding,GO:0003743~translation initiation factor activity,GO:0008135~translation factor activity, nucleic acid binding,GO:0016788~hydrolase activity, acting on ester bonds,GO:0043169~cation binding,
46370065	ext1,		Yes	Chondrosarcoma,Exostoses, multiple, type 1,trichorhinophalangeal syndrome, type II,	enchondromatosis |exostosis |Ollier disease |chondrosarcoma	exostoses (multiple) 1	Homo sapiens	8q24.11-q24.13,	GO:0005975~carbohydrate metabolic process,GO:0006790~sulfur metabolic process,GO:0007165~signal transduction,GO:0009059~macromolecule biosynthetic process,GO:0009308~amine metabolic process,GO:0009653~anatomical structure morphogenesis,GO:0009790~embryonic development,GO:0009888~tissue development,GO:0016051~carbohydrate biosynthetic process,GO:0044249~cellular biosynthetic process,GO:0044260~cel…	GO:0000139~Golgi membrane,GO:0005622~intracellular,GO:0005737~cytoplasm,GO:0005789~endoplasmic reticulum membrane,GO:0012505~endomembrane system,GO:0016020~membrane,GO:0031090~organelle membrane,GO:0031224~intrinsic to membrane,GO:0031300~intrinsic to organelle membrane,GO:0042175~nuclear envelope-endoplasmic reticulum network,GO:0043229~intracellular organelle,GO:0043231~intracellular membrane-b…	GO:0016757~transferase activity, transferring glycosyl groups,GO:0042802~identical protein binding,GO:0046983~protein dimerization activity,
61744446	FCN2,		Yes			ficolin (collagen/fibrinogen domain containing lectin) 2 (hucolin)	Homo sapiens	9q34.3,	GO:0002252~immune effector process,GO:0002682~regulation of immune system process,GO:0002684~positive regulation of immune system process,GO:0006810~transport,GO:0006897~endocytosis,GO:0006952~defense response,GO:0006956~complement activation,GO:0006959~humoral immune response,GO:0007165~signal transduction,GO:0008228~opsonization,GO:0009611~response to wounding,GO:0010324~membrane invagination,G…	GO:0005615~extracellular space,GO:0005622~intracellular,GO:0043229~intracellular organelle,GO:0043232~intracellular non-membrane-bounded organelle,GO:0044424~intracellular part,GO:0044430~cytoskeletal part,GO:0044446~intracellular organelle part,	GO:0005102~receptor binding,GO:0005529~sugar binding,GO:0043169~cation binding,GO:0048306~calcium-dependent protein binding,
133930787	foxo1,	Target of miR-9, miR-27, miR-96, miR-153, miR-183, and miR-186, and miR-486	Yes	Rhabdomyosarcoma, alveolar,	obesity |diabetes mellitus |hyperglycemia |rhabdomyosarcoma	forkhead box O1	Homo sapiens	13q14.1,	GO:0006139~nucleobase, nucleoside, nucleotide and nucleic acid metabolic process,GO:0009059~macromolecule biosynthetic process,GO:0009725~response to hormone stimulus,GO:0009889~regulation of biosynthetic process,GO:0009891~positive regulation of biosynthetic process,GO:0009893~positive regulation of metabolic process,GO:0010033~response to organic substance,GO:0010467~gene expression,GO:0010604~…	GO:0005622~intracellular,GO:0005737~cytoplasm,GO:0043229~intracellular organelle,GO:0043231~intracellular membrane-bounded organelle,GO:0043233~organelle lumen,GO:0044424~intracellular part,GO:0044428~nuclear part,GO:0044444~cytoplasmic part,GO:0044446~intracellular organelle part,GO:0070013~intracellular organelle lumen,	GO:0003677~DNA binding,
60498985	FOXP1,	With antisense transcript FOXP1-AS1; Target of miR-504 and miR-34a	Yes		lymphoma	forkhead box P1	Homo sapiens	3p14.1,	GO:0002200~somatic diversification of immune receptors,GO:0002252~immune effector process,GO:0002440~production of molecular mediator of immune response,GO:0002562~somatic diversification of immune receptors via germline recombination within a single locus,GO:0002682~regulation of immune system process,GO:0002684~positive regulation of immune system process,GO:0002699~positive regulation of immun…	GO:0005622~intracellular,GO:0043229~intracellular organelle,GO:0043231~intracellular membrane-bounded organelle,GO:0043232~intracellular non-membrane-bounded organelle,GO:0043233~organelle lumen,GO:0044424~intracellular part,GO:0044428~nuclear part,GO:0044446~intracellular organelle part,GO:0070013~intracellular organelle lumen,	GO:0003677~DNA binding,GO:0003705~RNA polymerase II transcription factor activity, enhancer binding,GO:0016566~specific transcriptional repressor activity,GO:0042802~identical protein binding,GO:0043169~cation binding,GO:0046983~protein dimerization activity,
283135212	Gabrg3,		Yes		Prader-Willi syndrome |Angelman syndrome |autism	gamma-aminobutyric acid (GABA) A receptor, gamma 3	Homo sapiens	15q12,	GO:0006810~transport,GO:0006811~ion transport,GO:0007267~cell-cell signaling,GO:0042493~response to drug,GO:0050877~neurological system process,	GO:0005886~plasma membrane,GO:0016020~membrane,GO:0031224~intrinsic to membrane,GO:0034702~ion channel complex,GO:0044425~membrane part,GO:0044459~plasma membrane part,GO:0045211~postsynaptic membrane,	GO:0004872~receptor activity,GO:0022803~passive transmembrane transporter activity,GO:0022891~substrate-specific transmembrane transporter activity,GO:0030594~neurotransmitter receptor activity,GO:0043168~anion binding,
134304850	GRIA2,	Target of miR-181b	Yes		epilepsy |vascular disease |dementia |schizophrenia	glutamate receptor, ionotropic, AMPA 2	Homo sapiens	4q32-q33,	GO:0006810~transport,GO:0006811~ion transport,GO:0006897~endocytosis,GO:0007165~signal transduction,GO:0007267~cell-cell signaling,GO:0008104~protein localization,GO:0010035~response to inorganic substance,GO:0010324~membrane invagination,GO:0010646~regulation of cell communication,GO:0010647~positive regulation of cell communication,GO:0016192~vesicle-mediated transport,GO:0019222~regulation of …	GO:0005622~intracellular,GO:0005737~cytoplasm,GO:0005886~plasma membrane,GO:0008021~synaptic vesicle,GO:0012505~endomembrane system,GO:0012506~vesicle membrane,GO:0014069~postsynaptic density,GO:0016020~membrane,GO:0030672~synaptic vesicle membrane,GO:0031090~organelle membrane,GO:0031224~intrinsic to membrane,GO:0031410~cytoplasmic vesicle,GO:0031988~membrane-bounded vesicle,GO:0043229~intracell…	GO:0004872~receptor activity,GO:0019904~protein domain specific binding,GO:0022803~passive transmembrane transporter activity,GO:0022891~substrate-specific transmembrane transporter activity,
4504140	Grm4,		Yes		epilepsy |schizophrenia |Parkinson's disease	glutamate receptor, metabotropic 4	Homo sapiens	6p21.3,	GO:0001505~regulation of neurotransmitter levels,GO:0006793~phosphorus metabolic process,GO:0006810~transport,GO:0006836~neurotransmitter transport,GO:0007165~signal transduction,GO:0007267~cell-cell signaling,GO:0007269~neurotransmitter secretion,GO:0007611~learning or memory,GO:0009889~regulation of biosynthetic process,GO:0010646~regulation of cell communication,GO:0010647~positive regulation …	GO:0005622~intracellular,GO:0005737~cytoplasm,GO:0005886~plasma membrane,GO:0016020~membrane,GO:0031224~intrinsic to membrane,GO:0031410~cytoplasmic vesicle,GO:0043229~intracellular organelle,GO:0044424~intracellular part,GO:0044425~membrane part,GO:0044444~cytoplasmic part,GO:0044459~plasma membrane part,	GO:0004872~receptor activity,
222418795	GNA14,	Potential target of miR-373 and miR-520c	Yes			guanine nucleotide binding protein (G protein), alpha 14	Homo sapiens	9q21,	GO:0007165~signal transduction,GO:0019538~protein metabolic process,GO:0044260~cellular macromolecule metabolic process,GO:0050794~regulation of cellular process,	GO:0005834~heterotrimeric G-protein complex,GO:0005886~plasma membrane,GO:0016020~membrane,GO:0019898~extrinsic to membrane,GO:0044425~membrane part,GO:0044459~plasma membrane part,	GO:0016817~hydrolase activity, acting on acid anhydrides,GO:0017076~purine nucleotide binding,GO:0032553~ribonucleotide binding,
52426776	Hs3st1,	Target of miR-200c	Yes		herpes simplex	heparan sulfate (glucosamine) 3-O-sulfotransferase 1	Homo sapiens	4p16,		GO:0005622~intracellular,GO:0005737~cytoplasm,GO:0016020~membrane,GO:0031224~intrinsic to membrane,GO:0043229~intracellular organelle,GO:0043231~intracellular membrane-bounded organelle,GO:0043233~organelle lumen,GO:0044424~intracellular part,GO:0044425~membrane part,GO:0044431~Golgi apparatus part,GO:0044444~cytoplasmic part,GO:0044446~intracellular organelle part,GO:0070013~intracellular organe…	GO:0016782~transferase activity, transferring sulfur-containing groups,
21396482, 21166388	Hist1h2bc,HIST1H2BE,HIST1H2BF,HIST1H2BG,HIST1H2BI,		Yes			histone cluster 1, H2bi; histone cluster 1, H2bg; histone cluster 1, H2be; histone cluster 1, H2bf; histone cluster 1, H2bc	Homo sapiens	6p21.3,	GO:0006952~defense response,GO:0009617~response to bacterium,GO:0031497~chromatin assembly,GO:0034621~cellular macromolecular complex subunit organization,GO:0034622~cellular macromolecular complex assembly,GO:0034728~nucleosome organization,GO:0051276~chromosome organization,GO:0051707~response to other organism,GO:0065003~macromolecular complex assembly,	GO:0000786~nucleosome,GO:0005622~intracellular,GO:0043229~intracellular organelle,GO:0043231~intracellular membrane-bounded organelle,GO:0043232~intracellular non-membrane-bounded organelle,GO:0044424~intracellular part,GO:0044427~chromosomal part,GO:0044446~intracellular organelle part,	GO:0003677~DNA binding,
20336753	HIST1H2BJ,		Yes	Variants in TF and HFE explain approximately 40% of genetic variation in serum-transferrin levels,		histone cluster 1, H2bj	Homo sapiens	6p22.1,	GO:0006952~defense response,GO:0009617~response to bacterium,GO:0031497~chromatin assembly,GO:0034621~cellular macromolecular complex subunit organization,GO:0034622~cellular macromolecular complex assembly,GO:0034728~nucleosome organization,GO:0051276~chromosome organization,GO:0051707~response to other organism,GO:0065003~macromolecular complex assembly,	GO:0000786~nucleosome,GO:0005622~intracellular,GO:0043229~intracellular organelle,GO:0043231~intracellular membrane-bounded organelle,GO:0043232~intracellular non-membrane-bounded organelle,GO:0044424~intracellular part,GO:0044427~chromosomal part,GO:0044446~intracellular organelle part,	GO:0003677~DNA binding,
15718721	HIST1H2BM,		Yes			histone cluster 1, H2bm	Homo sapiens	6p21.3,6p22-p21.3,	GO:0031497~chromatin assembly,GO:0034621~cellular macromolecular complex subunit organization,GO:0034622~cellular macromolecular complex assembly,GO:0034728~nucleosome organization,GO:0051276~chromosome organization,GO:0065003~macromolecular complex assembly,	GO:0000786~nucleosome,GO:0005622~intracellular,GO:0043229~intracellular organelle,GO:0043231~intracellular membrane-bounded organelle,GO:0043232~intracellular non-membrane-bounded organelle,GO:0044424~intracellular part,GO:0044427~chromosomal part,GO:0044446~intracellular organelle part,	GO:0003677~DNA binding,
16306565	HIST1H2BO,		Yes			histone cluster 1, H2bo	Homo sapiens	6p21.3,6p22-p21.3,	GO:0031497~chromatin assembly,GO:0034621~cellular macromolecular complex subunit organization,GO:0034622~cellular macromolecular complex assembly,GO:0034728~nucleosome organization,GO:0051276~chromosome organization,GO:0065003~macromolecular complex assembly,	GO:0000786~nucleosome,GO:0005622~intracellular,GO:0043229~intracellular organelle,GO:0043231~intracellular membrane-bounded organelle,GO:0043232~intracellular non-membrane-bounded organelle,GO:0044424~intracellular part,GO:0044427~chromosomal part,GO:0044446~intracellular organelle part,	GO:0003677~DNA binding,
28872748	HIST3H2BB,		No			histone cluster 3, H2bb	Homo sapiens	1q42.13,	GO:0031497~chromatin assembly,GO:0034621~cellular macromolecular complex subunit organization,GO:0034622~cellular macromolecular complex assembly,GO:0034728~nucleosome organization,GO:0051276~chromosome organization,GO:0065003~macromolecular complex assembly,	GO:0000786~nucleosome,GO:0005622~intracellular,GO:0043229~intracellular organelle,GO:0043231~intracellular membrane-bounded organelle,GO:0043232~intracellular non-membrane-bounded organelle,GO:0044424~intracellular part,GO:0044427~chromosomal part,GO:0044446~intracellular organelle part,	GO:0003677~DNA binding,
116284377	hdac9,		Yes		Hodgkin's lymphoma	histone deacetylase 9	Homo sapiens	7p21.1,	GO:0006139~nucleobase, nucleoside, nucleotide and nucleic acid metabolic process,GO:0006952~defense response,GO:0009059~macromolecule biosynthetic process,GO:0009611~response to wounding,GO:0009725~response to hormone stimulus,GO:0009889~regulation of biosynthetic process,GO:0009890~negative regulation of biosynthetic process,GO:0009892~negative regulation of metabolic process,GO:0010033~response…	GO:0005622~intracellular,GO:0005667~transcription factor complex,GO:0005737~cytoplasm,GO:0016585~chromatin remodeling complex,GO:0034708~methyltransferase complex,GO:0043229~intracellular organelle,GO:0043231~intracellular membrane-bounded organelle,GO:0043233~organelle lumen,GO:0044424~intracellular part,GO:0044428~nuclear part,GO:0044446~intracellular organelle part,GO:0070013~intracellular org…	GO:0003714~transcription corepressor activity,GO:0008134~transcription factor binding,GO:0016566~specific transcriptional repressor activity,GO:0016810~hydrolase activity, acting on carbon-nitrogen (but not peptide) bonds,GO:0019213~deacetylase activity,GO:0019899~enzyme binding,GO:0070491~transcription repressor binding,
156766039	Kif13b,	Potential target of miR-9 and miR-124	Yes			kinesin family member 13B	Homo sapiens	8p21.1,	GO:0006810~transport,GO:0007018~microtubule-based movement,GO:0007165~signal transduction,GO:0008104~protein localization,GO:0015031~protein transport,GO:0045184~establishment of protein localization,GO:0045321~leukocyte activation,GO:0046649~lymphocyte activation,GO:0046907~intracellular transport,GO:0050794~regulation of cellular process,GO:0051649~establishment of localization in cell,GO:00707…	GO:0005622~intracellular,GO:0005737~cytoplasm,GO:0043229~intracellular organelle,GO:0043232~intracellular non-membrane-bounded organelle,GO:0044424~intracellular part,GO:0044430~cytoskeletal part,GO:0044446~intracellular organelle part,	GO:0001883~purine nucleoside binding,GO:0016817~hydrolase activity, acting on acid anhydrides,GO:0017076~purine nucleotide binding,GO:0019899~enzyme binding,GO:0032553~ribonucleotide binding,
205361108	MCTP1,		Yes			multiple C2 domains, transmembrane 1	Homo sapiens	5q15,	GO:0007165~signal transduction,GO:0050794~regulation of cellular process,	GO:0000267~cell fraction,GO:0005626~insoluble fraction,GO:0016020~membrane,GO:0031224~intrinsic to membrane,GO:0044425~membrane part,	GO:0005543~phospholipid binding,GO:0043169~cation binding,
224451123	NBEAL1,		Yes			neurobeachin-like 1	Homo sapiens	2q33.2,
65506744	NTRK2,	Target of miR-204	Yes	Obesity, hyperphagia, and developmental delay,	neuroblastoma |brain disease |schizophrenia	neurotrophic tyrosine kinase, receptor, type 2	Homo sapiens	9q22.1,	GO:0006793~phosphorus metabolic process,GO:0006810~transport,GO:0007267~cell-cell signaling,GO:0007631~feeding behavior,GO:0009653~anatomical structure morphogenesis,GO:0009887~organ morphogenesis,GO:0009889~regulation of biosynthetic process,GO:0010646~regulation of cell communication,GO:0010647~positive regulation of cell communication,GO:0014047~glutamate secretion,GO:0019222~regulation of met…	GO:0005622~intracellular,GO:0005737~cytoplasm,GO:0005886~plasma membrane,GO:0009986~cell surface,GO:0014069~postsynaptic density,GO:0016020~membrane,GO:0030426~growth cone,GO:0030427~site of polarized growth,GO:0031224~intrinsic to membrane,GO:0033267~axon part,GO:0042995~cell projection,GO:0043005~neuron projection,GO:0043025~cell soma,GO:0043229~intracellular organelle,GO:0043232~intracellular …	GO:0001883~purine nucleoside binding,GO:0004872~receptor activity,GO:0016772~transferase activity, transferring phosphorus-containing groups,GO:0017076~purine nucleotide binding,GO:0019838~growth factor binding,GO:0032553~ribonucleotide binding,
59889561	NTRK3,	Target of miR-485-3p, miR-128, miR-509 and miR-765	Yes		congenital mesoblastic nephroma |congenital fibrosarcoma |medulloblastoma	neurotrophic tyrosine kinase, receptor, type 3	Homo sapiens	15q25,	GO:0001558~regulation of cell growth,GO:0006793~phosphorus metabolic process,GO:0008361~regulation of cell size,GO:0019538~protein metabolic process,GO:0022603~regulation of anatomical structure morphogenesis,GO:0022604~regulation of cell morphogenesis,GO:0030154~cell differentiation,GO:0030307~positive regulation of cell growth,GO:0031344~regulation of cell projection organization,GO:0031346~pos…	GO:0005622~intracellular,GO:0005737~cytoplasm,GO:0005886~plasma membrane,GO:0016020~membrane,GO:0031224~intrinsic to membrane,GO:0044424~intracellular part,GO:0044425~membrane part,GO:0044459~plasma membrane part,	GO:0001883~purine nucleoside binding,GO:0004872~receptor activity,GO:0016772~transferase activity, transferring phosphorus-containing groups,GO:0017076~purine nucleotide binding,GO:0019838~growth factor binding,GO:0032553~ribonucleotide binding,
70608154	PDE3A,	Potential target of miR-128a	Yes	Many sequence variants affecting diversity of adult human height,		phosphodiesterase 3A, cGMP-inhibited	Homo sapiens	12p12,	GO:0003006~reproductive developmental process,GO:0006629~lipid metabolic process,GO:0007165~signal transduction,GO:0007276~gamete generation,GO:0007281~germ cell development,GO:0007292~female gamete generation,GO:0010033~response to organic substance,GO:0010941~regulation of cell death,GO:0030154~cell differentiation,GO:0042493~response to drug,GO:0043069~negative regulation of programmed cell de…	GO:0000267~cell fraction,GO:0005622~intracellular,GO:0005625~soluble fraction,GO:0005626~insoluble fraction,GO:0005737~cytoplasm,GO:0016020~membrane,GO:0019898~extrinsic to membrane,GO:0044424~intracellular part,GO:0044425~membrane part,GO:0044444~cytoplasmic part,	GO:0016788~hydrolase activity, acting on ester bonds,
110227597	Plbd1,		Yes			phospholipase B domain containing 1	Homo sapiens	12p13.1,	GO:0006629~lipid metabolic process,GO:0016042~lipid catabolic process,
24797139	KCNJ3,	Target of miR-379	Yes		pertussis	potassium inwardly-rectifying channel, subfamily J, member 3	Homo sapiens	2q24.1,	GO:0006810~transport,GO:0006811~ion transport,	GO:0005886~plasma membrane,GO:0009897~external side of plasma membrane,GO:0009986~cell surface,GO:0016020~membrane,GO:0031224~intrinsic to membrane,GO:0034702~ion channel complex,GO:0044425~membrane part,GO:0044459~plasma membrane part,	GO:0022803~passive transmembrane transporter activity,GO:0022891~substrate-specific transmembrane transporter activity,GO:0043169~cation binding,
25121967	Kcnj6,		Yes		Down syndrome |Weaver syndrome |pertussis |Parkinson's disease	potassium inwardly-rectifying channel, subfamily J, member 6	Homo sapiens	21q22.1,21q22.1|21q22.13-q22.2,	GO:0006810~transport,GO:0006811~ion transport,	GO:0005622~intracellular,GO:0005737~cytoplasm,GO:0005886~plasma membrane,GO:0016020~membrane,GO:0031224~intrinsic to membrane,GO:0034702~ion channel complex,GO:0043229~intracellular organelle,GO:0043231~intracellular membrane-bounded organelle,GO:0044424~intracellular part,GO:0044425~membrane part,GO:0044444~cytoplasmic part,GO:0044459~plasma membrane part,	GO:0022803~passive transmembrane transporter activity,GO:0022891~substrate-specific transmembrane transporter activity,GO:0043169~cation binding,
34147628	PROX1,	With antisense transcript PROX1-AS1; Target of miR-181	Yes		lymphedema |lymphangiosarcoma |lymphangioma |capillary hemangioma	prospero homeobox 1	Homo sapiens	1q32.2-q32.3,	GO:0000902~cell morphogenesis,GO:0001709~cell fate determination,GO:0001743~optic placode formation,GO:0001946~lymphangiogenesis,GO:0002088~lens development in camera-type eye,GO:0002089~lens morphogenesis in camera-type eye,GO:0006139~nucleobase, nucleoside, nucleotide and nucleic acid metabolic process,GO:0007010~cytoskeleton organization,GO:0008284~positive regulation of cell proliferation,GO:…	GO:0005622~intracellular,GO:0005737~cytoplasm,GO:0043229~intracellular organelle,GO:0043231~intracellular membrane-bounded organelle,GO:0044424~intracellular part,	GO:0003677~DNA binding,GO:0003705~RNA polymerase II transcription factor activity, enhancer binding,GO:0003714~transcription corepressor activity,GO:0005102~receptor binding,GO:0008134~transcription factor binding,GO:0019904~protein domain specific binding,
42560228	Rbpj,	Target of miR-223	Yes		cadasil |Kaposi's sarcoma	recombination signal binding protein for immunoglobulin kappa J region	Homo sapiens	4p15.2,	GO:0001525~angiogenesis,GO:0003002~regionalization,GO:0006139~nucleobase, nucleoside, nucleotide and nucleic acid metabolic process,GO:0007389~pattern specification process,GO:0009059~macromolecule biosynthetic process,GO:0009653~anatomical structure morphogenesis,GO:0009790~embryonic development,GO:0009792~embryonic development ending in birth or egg hatching,GO:0009799~determination of symmetry…	GO:0005622~intracellular,GO:0043229~intracellular organelle,GO:0043231~intracellular membrane-bounded organelle,GO:0043232~intracellular non-membrane-bounded organelle,GO:0043233~organelle lumen,GO:0044424~intracellular part,GO:0044428~nuclear part,GO:0044446~intracellular organelle part,GO:0070013~intracellular organelle lumen,	GO:0003677~DNA binding,
154146198	sall3,		Yes	Genome-wide association study of rheumatoid arthritis in the Spanish population: KLF12 as a risk locus for rheumatoid arthritis susceptibility,		sal-like 3 (Drosophila)	Homo sapiens	18q23,	GO:0006139~nucleobase, nucleoside, nucleotide and nucleic acid metabolic process,GO:0009059~macromolecule biosynthetic process,GO:0009889~regulation of biosynthetic process,GO:0010467~gene expression,GO:0019222~regulation of metabolic process,GO:0021537~telencephalon development,GO:0021772~olfactory bulb development,GO:0021988~olfactory lobe development,GO:0030154~cell differentiation,GO:0030900~…	GO:0005622~intracellular,GO:0005737~cytoplasm,GO:0043229~intracellular organelle,GO:0043231~intracellular membrane-bounded organelle,GO:0044424~intracellular part,	GO:0003677~DNA binding,GO:0043169~cation binding,
94721264	SGCZ,	Host of miR-383	No		muscular dystrophy	sarcoglycan zeta	Homo sapiens	8p22,	GO:0007010~cytoskeleton organization,	GO:0005622~intracellular,GO:0005737~cytoplasm,GO:0005886~plasma membrane,GO:0016010~dystrophin-associated glycoprotein complex,GO:0016011~dystroglycan complex,GO:0016012~sarcoglycan complex,GO:0016020~membrane,GO:0031224~intrinsic to membrane,GO:0043229~intracellular organelle,GO:0043232~intracellular non-membrane-bounded organelle,GO:0044424~intracellular part,GO:0044425~membrane part,GO:0044459…
254588059	serpinc1,		Yes	Antithrombin III deficiency,	respiratory failure |hyperhomocysteinemia |heart disease |group B streptococcal pneumonia |antithrombin III deficiency |lupus erythematosus |cancer |placental abruption |vascular disease |nephrotic syndrome |liver disease |hemophilia |thrombophilia	serpin peptidase inhibitor, clade C (antithrombin), member 1	Homo sapiens	1q23-q25.1,	GO:0007584~response to nutrient,GO:0007596~blood coagulation,GO:0007599~hemostasis,GO:0009611~response to wounding,GO:0009991~response to extracellular stimulus,GO:0031348~negative regulation of defense response,GO:0032101~regulation of response to external stimulus,GO:0032102~negative regulation of response to external stimulus,GO:0048519~negative regulation of biological process,GO:0048583~regu…	GO:0005615~extracellular space,GO:0005886~plasma membrane,GO:0016020~membrane,	GO:0019899~enzyme binding,GO:0030247~polysaccharide binding,GO:0030414~peptidase inhibitor activity,
49472836	SFXN3,		Yes			sideroflexin 3	Homo sapiens	10q24.31,	GO:0006810~transport,GO:0006811~ion transport,GO:0055085~transmembrane transport,	GO:0005622~intracellular,GO:0005737~cytoplasm,GO:0016020~membrane,GO:0031224~intrinsic to membrane,GO:0043229~intracellular organelle,GO:0043231~intracellular membrane-bounded organelle,GO:0044424~intracellular part,GO:0044425~membrane part,GO:0044444~cytoplasmic part,	GO:0022891~substrate-specific transmembrane transporter activity,GO:0043169~cation binding,
40787998	SSBP2,	Potential target of miR-21	Yes			single-stranded DNA binding protein 2	Homo sapiens	5q14.1,	GO:0009889~regulation of biosynthetic process,GO:0019222~regulation of metabolic process,GO:0031323~regulation of cellular metabolic process,GO:0050794~regulation of cellular process,GO:0051171~regulation of nitrogen compound metabolic process,GO:0060255~regulation of macromolecule metabolic process,GO:0080090~regulation of primary metabolic process,	GO:0005622~intracellular,GO:0005737~cytoplasm,GO:0043229~intracellular organelle,GO:0043231~intracellular membrane-bounded organelle,GO:0044424~intracellular part,	GO:0003677~DNA binding,
188528674	slit1,	Potential target of miR-449	Yes			slit homolog 1 (Drosophila)	Homo sapiens	10q23.3-q24,	GO:0000902~cell morphogenesis,GO:0006928~cell motion,GO:0007411~axon guidance,GO:0009653~anatomical structure morphogenesis,GO:0030154~cell differentiation,GO:0031175~neuron projection development,GO:0032989~cellular component morphogenesis,GO:0032990~cell part morphogenesis,GO:0040023~establishment of nucleus localization,GO:0048468~cell development,GO:0048513~organ development,GO:0048731~system…	GO:0005615~extracellular space,GO:0005622~intracellular,GO:0043229~intracellular organelle,GO:0043231~intracellular membrane-bounded organelle,GO:0044424~intracellular part,	GO:0043169~cation binding,
194239636	SLIT3,	Host gene of miR-218	Yes		congenital diaphragmatic hernia	slit homolog 3 (Drosophila)	Homo sapiens	5q35,	GO:0000902~cell morphogenesis,GO:0006928~cell motion,GO:0007411~axon guidance,GO:0009653~anatomical structure morphogenesis,GO:0009887~organ morphogenesis,GO:0030154~cell differentiation,GO:0031175~neuron projection development,GO:0032989~cellular component morphogenesis,GO:0032990~cell part morphogenesis,GO:0048468~cell development,GO:0048513~organ development,GO:0048731~system development,GO:00…	GO:0000267~cell fraction,GO:0005615~extracellular space,GO:0005622~intracellular,GO:0005626~insoluble fraction,GO:0005737~cytoplasm,GO:0043229~intracellular organelle,GO:0043231~intracellular membrane-bounded organelle,GO:0044424~intracellular part,GO:0044444~cytoplasmic part,	GO:0043169~cation binding,
34222196	slc16a7,		Yes		hypoglycemia	solute carrier family 16, member 7 (monocarboxylic acid transporter 2)	Homo sapiens	12q13,	GO:0006082~organic acid metabolic process,GO:0006810~transport,GO:0006811~ion transport,GO:0015849~organic acid transport,GO:0042180~cellular ketone metabolic process,GO:0055085~transmembrane transport,	GO:0000267~cell fraction,GO:0005626~insoluble fraction,GO:0005886~plasma membrane,GO:0016020~membrane,GO:0031224~intrinsic to membrane,GO:0044425~membrane part,GO:0044459~plasma membrane part,	GO:0022804~active transmembrane transporter activity,GO:0022891~substrate-specific transmembrane transporter activity,
90265811	SLC25A33,		Yes			solute carrier family 25, member 33	Homo sapiens	1p36.22,	GO:0006810~transport,GO:0055085~transmembrane transport,	GO:0005622~intracellular,GO:0005737~cytoplasm,GO:0005740~mitochondrial envelope,GO:0016020~membrane,GO:0019866~organelle inner membrane,GO:0031090~organelle membrane,GO:0031224~intrinsic to membrane,GO:0031966~mitochondrial membrane,GO:0031967~organelle envelope,GO:0043229~intracellular organelle,GO:0043231~intracellular membrane-bounded organelle,GO:0044424~intracellular part,GO:0044425~membrane…
49533616	soat1,		Yes		hypercholesterolemia |atherosclerosis	sterol O-acyltransferase 1	Homo sapiens	1q25,	GO:0006629~lipid metabolic process,GO:0006810~transport,GO:0006869~lipid transport,GO:0009889~regulation of biosynthetic process,GO:0009891~positive regulation of biosynthetic process,GO:0009893~positive regulation of metabolic process,GO:0010604~positive regulation of macromolecule metabolic process,GO:0010876~lipid localization,GO:0016125~sterol metabolic process,GO:0019222~regulation of metabo…	GO:0000267~cell fraction,GO:0005622~intracellular,GO:0005626~insoluble fraction,GO:0005737~cytoplasm,GO:0005789~endoplasmic reticulum membrane,GO:0012505~endomembrane system,GO:0016020~membrane,GO:0031090~organelle membrane,GO:0031224~intrinsic to membrane,GO:0042175~nuclear envelope-endoplasmic reticulum network,GO:0043229~intracellular organelle,GO:0043231~intracellular membrane-bounded organel…	GO:0005496~steroid binding,GO:0005504~fatty acid binding,GO:0016746~transferase activity, transferring acyl groups,GO:0033293~monocarboxylic acid binding,GO:0050662~coenzyme binding,
154091313	TRPM3,	Host gene of miR-204	Yes			transient receptor potential cation channel, subfamily M, member 3	Homo sapiens	9q21.11-q21.12,	GO:0006810~transport,GO:0006811~ion transport,GO:0055085~transmembrane transport,	GO:0016020~membrane,GO:0031224~intrinsic to membrane,GO:0044425~membrane part,	GO:0004872~receptor activity,GO:0022803~passive transmembrane transporter activity,GO:0022891~substrate-specific transmembrane transporter activity,GO:0043169~cation binding,
133904027	tnpo1,	Potential target of miR-101, miR-181a and miR-144	Yes		absence epilepsy	transportin 1	Homo sapiens	5q13.2,	GO:0006461~protein complex assembly,GO:0006810~transport,GO:0008104~protein localization,GO:0015031~protein transport,GO:0034621~cellular macromolecular complex subunit organization,GO:0034622~cellular macromolecular complex assembly,GO:0045184~establishment of protein localization,GO:0046907~intracellular transport,GO:0051649~establishment of localization in cell,GO:0065003~macromolecular comple…	GO:0005622~intracellular,GO:0005635~nuclear envelope,GO:0005643~nuclear pore,GO:0005737~cytoplasm,GO:0012505~endomembrane system,GO:0016020~membrane,GO:0031224~intrinsic to membrane,GO:0031967~organelle envelope,GO:0043229~intracellular organelle,GO:0043231~intracellular membrane-bounded organelle,GO:0044424~intracellular part,GO:0044425~membrane part,GO:0044428~nuclear part,GO:0044446~intracellu…	GO:0005048~signal sequence binding,GO:0008565~protein transporter activity,
150417995	UBA6,		Yes			ubiquitin-like modifier activating enzyme 6	Homo sapiens	4q13.2,	GO:0009057~macromolecule catabolic process,GO:0019538~protein metabolic process,GO:0044248~cellular catabolic process,GO:0044260~cellular macromolecule metabolic process,	GO:0005622~intracellular,GO:0005737~cytoplasm,GO:0044424~intracellular part,	GO:0001883~purine nucleoside binding,GO:0017076~purine nucleotide binding,GO:0032553~ribonucleotide binding,
157694498	ZBTB10,	Target of miR-27a	Yes			zinc finger and BTB domain containing 10	Homo sapiens	8q13-q21.1,	GO:0006139~nucleobase, nucleoside, nucleotide and nucleic acid metabolic process,GO:0009059~macromolecule biosynthetic process,GO:0009889~regulation of biosynthetic process,GO:0010467~gene expression,GO:0019222~regulation of metabolic process,GO:0031323~regulation of cellular metabolic process,GO:0034641~cellular nitrogen compound metabolic process,GO:0044249~cellular biosynthetic process,GO:0044…	GO:0005622~intracellular,GO:0043229~intracellular organelle,GO:0043231~intracellular membrane-bounded organelle,GO:0043232~intracellular non-membrane-bounded organelle,GO:0043233~organelle lumen,GO:0044424~intracellular part,GO:0044428~nuclear part,GO:0044446~intracellular organelle part,GO:0070013~intracellular organelle lumen,	GO:0003677~DNA binding,GO:0043169~cation binding,
257900536	ZBTB20,	With antisense transcripts ZBTB20-AS1, ZBTB20-AS2, ZBTB20-AS3 and ZBTB20-AS4; Target of miR-124	Yes			zinc finger and BTB domain containing 20	Homo sapiens	3q13.2,	GO:0006139~nucleobase, nucleoside, nucleotide and nucleic acid metabolic process,GO:0009059~macromolecule biosynthetic process,GO:0009889~regulation of biosynthetic process,GO:0010467~gene expression,GO:0019222~regulation of metabolic process,GO:0031323~regulation of cellular metabolic process,GO:0034641~cellular nitrogen compound metabolic process,GO:0044249~cellular biosynthetic process,GO:0044…	GO:0005622~intracellular,GO:0043229~intracellular organelle,GO:0043231~intracellular membrane-bounded organelle,GO:0043232~intracellular non-membrane-bounded organelle,GO:0043233~organelle lumen,GO:0044424~intracellular part,GO:0044428~nuclear part,GO:0044446~intracellular organelle part,GO:0070013~intracellular organelle lumen,	GO:0003677~DNA binding,GO:0043169~cation binding,
221136819	ZNF121,		No			zinc finger protein 121	Homo sapiens	19p,	GO:0006139~nucleobase, nucleoside, nucleotide and nucleic acid metabolic process,GO:0009059~macromolecule biosynthetic process,GO:0009889~regulation of biosynthetic process,GO:0010467~gene expression,GO:0019222~regulation of metabolic process,GO:0031323~regulation of cellular metabolic process,GO:0034641~cellular nitrogen compound metabolic process,GO:0044249~cellular biosynthetic process,GO:0044…	GO:0005622~intracellular,GO:0043229~intracellular organelle,GO:0043231~intracellular membrane-bounded organelle,GO:0044424~intracellular part,	GO:0003677~DNA binding,GO:0043169~cation binding,
42733607	ZNF124,		Yes			zinc finger protein 124	Homo sapiens	1q44,	GO:0006139~nucleobase, nucleoside, nucleotide and nucleic acid metabolic process,GO:0009059~macromolecule biosynthetic process,GO:0009889~regulation of biosynthetic process,GO:0010467~gene expression,GO:0019222~regulation of metabolic process,GO:0031323~regulation of cellular metabolic process,GO:0034641~cellular nitrogen compound metabolic process,GO:0044249~cellular biosynthetic process,GO:0044…	GO:0005622~intracellular,GO:0043229~intracellular organelle,GO:0043231~intracellular membrane-bounded organelle,GO:0044424~intracellular part,	GO:0003677~DNA binding,GO:0043169~cation binding,
37693524	ZNF189,		Yes		basal cell carcinoma	zinc finger protein 189	Homo sapiens	9q22-q31,	GO:0006139~nucleobase, nucleoside, nucleotide and nucleic acid metabolic process,GO:0009059~macromolecule biosynthetic process,GO:0009889~regulation of biosynthetic process,GO:0009890~negative regulation of biosynthetic process,GO:0009892~negative regulation of metabolic process,GO:0010467~gene expression,GO:0010605~negative regulation of macromolecule metabolic process,GO:0019222~regulation of m…	GO:0005622~intracellular,GO:0043229~intracellular organelle,GO:0043231~intracellular membrane-bounded organelle,GO:0044424~intracellular part,	GO:0003677~DNA binding,GO:0043169~cation binding,
56699472	ZNF192,		Yes		hemochromatosis	zinc finger protein 192	Homo sapiens	6p21.3,	GO:0006139~nucleobase, nucleoside, nucleotide and nucleic acid metabolic process,GO:0009059~macromolecule biosynthetic process,GO:0009889~regulation of biosynthetic process,GO:0010467~gene expression,GO:0019222~regulation of metabolic process,GO:0031323~regulation of cellular metabolic process,GO:0034641~cellular nitrogen compound metabolic process,GO:0044249~cellular biosynthetic process,GO:0044…	GO:0005622~intracellular,GO:0005737~cytoplasm,GO:0043229~intracellular organelle,GO:0043231~intracellular membrane-bounded organelle,GO:0044424~intracellular part,	GO:0003677~DNA binding,GO:0043169~cation binding,
110347438	ZNF225,	Potential target of miR-23	Yes			zinc finger protein 225	Homo sapiens	19q13.2,	GO:0006139~nucleobase, nucleoside, nucleotide and nucleic acid metabolic process,GO:0009059~macromolecule biosynthetic process,GO:0009889~regulation of biosynthetic process,GO:0010467~gene expression,GO:0019222~regulation of metabolic process,GO:0031323~regulation of cellular metabolic process,GO:0034641~cellular nitrogen compound metabolic process,GO:0044249~cellular biosynthetic process,GO:0044…	GO:0005622~intracellular,GO:0043229~intracellular organelle,GO:0043231~intracellular membrane-bounded organelle,GO:0044424~intracellular part,	GO:0003677~DNA binding,GO:0043169~cation binding,
40255235	ZNF281,		Yes			zinc finger protein 281	Homo sapiens	1q32.1,	GO:0006139~nucleobase, nucleoside, nucleotide and nucleic acid metabolic process,GO:0009059~macromolecule biosynthetic process,GO:0009889~regulation of biosynthetic process,GO:0009890~negative regulation of biosynthetic process,GO:0009892~negative regulation of metabolic process,GO:0010467~gene expression,GO:0010605~negative regulation of macromolecule metabolic process,GO:0019222~regulation of m…	GO:0005622~intracellular,GO:0043229~intracellular organelle,GO:0043231~intracellular membrane-bounded organelle,GO:0044424~intracellular part,	GO:0003677~DNA binding,GO:0003704~specific RNA polymerase II transcription factor activity,GO:0043169~cation binding,
149588642	ZNF283,		Yes			zinc finger protein 283	Homo sapiens	19q13.31,	GO:0006139~nucleobase, nucleoside, nucleotide and nucleic acid metabolic process,GO:0009059~macromolecule biosynthetic process,GO:0009889~regulation of biosynthetic process,GO:0010467~gene expression,GO:0019222~regulation of metabolic process,GO:0031323~regulation of cellular metabolic process,GO:0034641~cellular nitrogen compound metabolic process,GO:0044249~cellular biosynthetic process,GO:0044…	GO:0005622~intracellular,GO:0043229~intracellular organelle,GO:0043231~intracellular membrane-bounded organelle,GO:0044424~intracellular part,	GO:0003677~DNA binding,GO:0043169~cation binding,
194328782	ZNF287,		Yes			zinc finger protein 287	Homo sapiens	17p11.2,	GO:0001817~regulation of cytokine production,GO:0006139~nucleobase, nucleoside, nucleotide and nucleic acid metabolic process,GO:0009059~macromolecule biosynthetic process,GO:0009889~regulation of biosynthetic process,GO:0009891~positive regulation of biosynthetic process,GO:0009893~positive regulation of metabolic process,GO:0010467~gene expression,GO:0010604~positive regulation of macromolecule…	GO:0005622~intracellular,GO:0043229~intracellular organelle,GO:0043231~intracellular membrane-bounded organelle,GO:0044424~intracellular part,	GO:0003677~DNA binding,GO:0043169~cation binding,
30794503	ZNF354C,		No			zinc finger protein 354C	Homo sapiens	5q35,	GO:0006139~nucleobase, nucleoside, nucleotide and nucleic acid metabolic process,GO:0009059~macromolecule biosynthetic process,GO:0009889~regulation of biosynthetic process,GO:0010467~gene expression,GO:0019222~regulation of metabolic process,GO:0031323~regulation of cellular metabolic process,GO:0034641~cellular nitrogen compound metabolic process,GO:0044249~cellular biosynthetic process,GO:0044…	GO:0005622~intracellular,GO:0043229~intracellular organelle,GO:0043231~intracellular membrane-bounded organelle,GO:0044424~intracellular part,	GO:0003677~DNA binding,GO:0043169~cation binding,
116089279	ZNF436,		Yes			zinc finger protein 436	Homo sapiens	1p36,	GO:0006139~nucleobase, nucleoside, nucleotide and nucleic acid metabolic process,GO:0009059~macromolecule biosynthetic process,GO:0009889~regulation of biosynthetic process,GO:0010467~gene expression,GO:0019222~regulation of metabolic process,GO:0031323~regulation of cellular metabolic process,GO:0034641~cellular nitrogen compound metabolic process,GO:0044249~cellular biosynthetic process,GO:0044…	GO:0005622~intracellular,GO:0043229~intracellular organelle,GO:0043231~intracellular membrane-bounded organelle,GO:0044424~intracellular part,	GO:0003677~DNA binding,GO:0043169~cation binding,
224028217	ZNF506,		Yes			zinc finger protein 506	Homo sapiens	19p13.11,	GO:0006139~nucleobase, nucleoside, nucleotide and nucleic acid metabolic process,GO:0009059~macromolecule biosynthetic process,GO:0009889~regulation of biosynthetic process,GO:0010467~gene expression,GO:0019222~regulation of metabolic process,GO:0031323~regulation of cellular metabolic process,GO:0034641~cellular nitrogen compound metabolic process,GO:0044249~cellular biosynthetic process,GO:0044…	GO:0005622~intracellular,GO:0043229~intracellular organelle,GO:0043231~intracellular membrane-bounded organelle,GO:0043232~intracellular non-membrane-bounded organelle,GO:0043233~organelle lumen,GO:0044424~intracellular part,GO:0044428~nuclear part,GO:0044446~intracellular organelle part,GO:0070013~intracellular organelle lumen,	GO:0003677~DNA binding,GO:0043169~cation binding,
194018468	ZNF546,		Yes			zinc finger protein 546	Homo sapiens	19q13.2,	GO:0006139~nucleobase, nucleoside, nucleotide and nucleic acid metabolic process,GO:0009059~macromolecule biosynthetic process,GO:0009889~regulation of biosynthetic process,GO:0010467~gene expression,GO:0019222~regulation of metabolic process,GO:0031323~regulation of cellular metabolic process,GO:0034641~cellular nitrogen compound metabolic process,GO:0044249~cellular biosynthetic process,GO:0044…	GO:0005622~intracellular,GO:0043229~intracellular organelle,GO:0043231~intracellular membrane-bounded organelle,GO:0044424~intracellular part,	GO:0003677~DNA binding,GO:0043169~cation binding,
157167157	ZNF808,		No			zinc finger protein 808	Homo sapiens	19q13.41,	GO:0006139~nucleobase, nucleoside, nucleotide and nucleic acid metabolic process,GO:0009059~macromolecule biosynthetic process,GO:0009889~regulation of biosynthetic process,GO:0010467~gene expression,GO:0019222~regulation of metabolic process,GO:0031323~regulation of cellular metabolic process,GO:0034641~cellular nitrogen compound metabolic process,GO:0044249~cellular biosynthetic process,GO:0044…	GO:0005622~intracellular,GO:0043229~intracellular organelle,GO:0043231~intracellular membrane-bounded organelle,GO:0044424~intracellular part,	GO:0003677~DNA binding,GO:0043169~cation binding,
211058420	ZNF844,		Yes			zinc finger protein 844	Homo sapiens	19p13.2,	GO:0006139~nucleobase, nucleoside, nucleotide and nucleic acid metabolic process,GO:0009059~macromolecule biosynthetic process,GO:0009889~regulation of biosynthetic process,GO:0010467~gene expression,GO:0019222~regulation of metabolic process,GO:0031323~regulation of cellular metabolic process,GO:0034641~cellular nitrogen compound metabolic process,GO:0044249~cellular biosynthetic process,GO:0044…	GO:0005622~intracellular,GO:0043229~intracellular organelle,GO:0043231~intracellular membrane-bounded organelle,GO:0044424~intracellular part,	GO:0003677~DNA binding,GO:0043169~cation binding,
300360561	tead4,		Yes		fallopian tube carcinoma |seminoma	TEA domain family member 4	Homo sapiens	12p13.3-p13.2,	GO:0001708~cell fate specification,GO:0001824~blastocyst development,GO:0001825~blastocyst formation,GO:0006139~nucleobase, nucleoside, nucleotide and nucleic acid metabolic process,GO:0007565~female pregnancy,GO:0007566~embryo implantation,GO:0009059~macromolecule biosynthetic process,GO:0009653~anatomical structure morphogenesis,GO:0009790~embryonic development,GO:0009792~embryonic development …	GO:0005622~intracellular,GO:0005667~transcription factor complex,GO:0043229~intracellular organelle,GO:0043231~intracellular membrane-bounded organelle,GO:0043233~organelle lumen,GO:0044424~intracellular part,GO:0044428~nuclear part,GO:0044446~intracellular organelle part,GO:0070013~intracellular organelle lumen,	GO:0003677~DNA binding,
297307156	add2,		Yes		hypertension |intestinal capillariasis |attention deficit hyperactivity disease |hereditary spherocytosis |echolalia	adducin 2 (beta)	Homo sapiens	2p14-p13,	GO:0006810~transport,GO:0006811~ion transport,GO:0007010~cytoskeleton organization,GO:0010639~negative regulation of organelle organization,GO:0030036~actin cytoskeleton organization,GO:0031333~negative regulation of protein complex assembly,GO:0032535~regulation of cellular component size,GO:0032970~regulation of actin filament-based process,GO:0033043~regulation of organelle organization,GO:004…	GO:0005622~intracellular,GO:0005737~cytoplasm,GO:0005886~plasma membrane,GO:0008290~F-actin capping protein complex,GO:0016020~membrane,GO:0043229~intracellular organelle,GO:0043232~intracellular non-membrane-bounded organelle,GO:0044424~intracellular part,GO:0044425~membrane part,GO:0044430~cytoskeletal part,GO:0044446~intracellular organelle part,GO:0044459~plasma membrane part,	GO:0005516~calmodulin binding,GO:0008092~cytoskeletal protein binding,GO:0042802~identical protein binding,GO:0043169~cation binding,GO:0046983~protein dimerization activity,
319084482	CNTNAP3,CNTNAP3B,		Yes		cyclothymic disease	contactin associated protein-like 3; contactin associated protein-like 3B	Homo sapiens	9p11.2,9p13.1,	GO:0007165~signal transduction,GO:0050794~regulation of cellular process,	GO:0005886~plasma membrane,GO:0016020~membrane,GO:0031224~intrinsic to membrane,GO:0044425~membrane part,	GO:0005102~receptor binding,
296011033	CPEB3,	Target of miR-21, miR-92 and miR-26	Yes			cytoplasmic polyadenylation element binding protein 3	Homo sapiens	10q23.32,			GO:0003723~RNA binding,
325197220	DGKH,		No		schizophrenia	diacylglycerol kinase, eta	Homo sapiens	13q14.11,	GO:0006461~protein complex assembly,GO:0007165~signal transduction,GO:0019222~regulation of metabolic process,GO:0031323~regulation of cellular metabolic process,GO:0044093~positive regulation of molecular function,GO:0050790~regulation of catalytic activity,GO:0050794~regulation of cellular process,GO:0065003~macromolecular complex assembly,	GO:0005622~intracellular,GO:0005737~cytoplasm,GO:0043229~intracellular organelle,GO:0043231~intracellular membrane-bounded organelle,GO:0044424~intracellular part,GO:0044444~cytoplasmic part,	GO:0001883~purine nucleoside binding,GO:0016772~transferase activity, transferring phosphorus-containing groups,GO:0017076~purine nucleotide binding,GO:0019992~diacylglycerol binding,GO:0032553~ribonucleotide binding,GO:0043169~cation binding,
308818199	Dpysl3,	Target of miR-132	Yes			dihydropyrimidinase-like 3	Homo sapiens	5q32,	GO:0006139~nucleobase, nucleoside, nucleotide and nucleic acid metabolic process,GO:0007165~signal transduction,GO:0034641~cellular nitrogen compound metabolic process,GO:0048731~system development,GO:0050794~regulation of cellular process,	GO:0005622~intracellular,GO:0005737~cytoplasm,GO:0005886~plasma membrane,GO:0016020~membrane,GO:0030426~growth cone,GO:0030427~site of polarized growth,GO:0042995~cell projection,GO:0043005~neuron projection,GO:0043229~intracellular organelle,GO:0043232~intracellular non-membrane-bounded organelle,GO:0044424~intracellular part,	GO:0016810~hydrolase activity, acting on carbon-nitrogen (but not peptide) bonds,
324073531	EIF2C3,	Potential target of miR-129	Yes		yellow fever	eukaryotic translation initiation factor 2C, 3	Homo sapiens	1p34.3,	GO:0006139~nucleobase, nucleoside, nucleotide and nucleic acid metabolic process,GO:0009057~macromolecule catabolic process,GO:0009889~regulation of biosynthetic process,GO:0009890~negative regulation of biosynthetic process,GO:0009892~negative regulation of metabolic process,GO:0010605~negative regulation of macromolecule metabolic process,GO:0016441~posttranscriptional gene silencing,GO:0019222…	GO:0000932~cytoplasmic mRNA processing body,GO:0005622~intracellular,GO:0005737~cytoplasm,GO:0030529~ribonucleoprotein complex,GO:0044424~intracellular part,GO:0044444~cytoplasmic part,	GO:0003723~RNA binding,GO:0003743~translation initiation factor activity,GO:0008135~translation factor activity, nucleic acid binding,
312176363	GNAQ,		Yes		blue nevus |heart failure |cellular blue nevus |pertussis |melanoma	guanine nucleotide binding protein (G protein), q polypeptide	Homo sapiens	9q21,	GO:0007165~signal transduction,GO:0007596~blood coagulation,GO:0007599~hemostasis,GO:0009611~response to wounding,GO:0009653~anatomical structure morphogenesis,GO:0009790~embryonic development,GO:0009791~post-embryonic development,GO:0009889~regulation of biosynthetic process,GO:0019222~regulation of metabolic process,GO:0019538~protein metabolic process,GO:0030154~cell differentiation,GO:0030900…	GO:0000267~cell fraction,GO:0005622~intracellular,GO:0005626~insoluble fraction,GO:0005737~cytoplasm,GO:0005886~plasma membrane,GO:0016020~membrane,GO:0044424~intracellular part,	GO:0016788~hydrolase activity, acting on ester bonds,GO:0016817~hydrolase activity, acting on acid anhydrides,GO:0017076~purine nucleotide binding,GO:0032553~ribonucleotide binding,
316659209	ncam2,		Yes		Down syndrome	neural cell adhesion molecule 2	Homo sapiens	21q21.1,	GO:0000902~cell morphogenesis,GO:0008038~neuron recognition,GO:0009653~anatomical structure morphogenesis,GO:0016337~cell-cell adhesion,GO:0030154~cell differentiation,GO:0031175~neuron projection development,GO:0032989~cellular component morphogenesis,GO:0032990~cell part morphogenesis,GO:0048468~cell development,GO:0048731~system development,GO:0048858~cell projection morphogenesis,GO:0050877~n…	GO:0005886~plasma membrane,GO:0016020~membrane,GO:0031224~intrinsic to membrane,GO:0042995~cell projection,GO:0043005~neuron projection,GO:0044425~membrane part,
341913860	LOC100287515,		Yes			similar to zinc finger protein 26 (KOX 20)	Homo sapiens
294459961	TRPV4,		Yes		brachyolmia |motor peripheral neuropathy |Charcot-Marie-Tooth disease |dentin sensitivity	transient receptor potential cation channel, subfamily V, member 4	Homo sapiens	12q24.1,	GO:0006810~transport,GO:0006811~ion transport,GO:0006884~cell volume homeostasis,GO:0006970~response to osmotic stress,GO:0007267~cell-cell signaling,GO:0009612~response to mechanical stimulus,GO:0009914~hormone transport,GO:0010817~regulation of hormone levels,GO:0015833~peptide transport,GO:0032940~secretion by cell,GO:0033554~cellular response to stress,GO:0042592~homeostatic process,GO:004687…	GO:0005886~plasma membrane,GO:0005929~cilium,GO:0016020~membrane,GO:0031224~intrinsic to membrane,GO:0042995~cell projection,GO:0044425~membrane part,	GO:0004872~receptor activity,GO:0005516~calmodulin binding,GO:0022803~passive transmembrane transporter activity,GO:0022891~substrate-specific transmembrane transporter activity,GO:0042802~identical protein binding,GO:0043169~cation binding,
289547715	ZNF585B,		Yes			zinc finger protein 585B	Homo sapiens	19q13.12,	GO:0006139~nucleobase, nucleoside, nucleotide and nucleic acid metabolic process,GO:0009059~macromolecule biosynthetic process,GO:0009889~regulation of biosynthetic process,GO:0010467~gene expression,GO:0019222~regulation of metabolic process,GO:0031323~regulation of cellular metabolic process,GO:0034641~cellular nitrogen compound metabolic process,GO:0044249~cellular biosynthetic process,GO:0044…	GO:0005622~intracellular,GO:0043229~intracellular organelle,GO:0043231~intracellular membrane-bounded organelle,GO:0044424~intracellular part,	GO:0043169~cation binding,
302318943	ZNF714,		Yes			zinc finger protein 714	Homo sapiens	19p12,	GO:0006139~nucleobase, nucleoside, nucleotide and nucleic acid metabolic process,GO:0009059~macromolecule biosynthetic process,GO:0009889~regulation of biosynthetic process,GO:0010467~gene expression,GO:0019222~regulation of metabolic process,GO:0031323~regulation of cellular metabolic process,GO:0034641~cellular nitrogen compound metabolic process,GO:0044249~cellular biosynthetic process,GO:0044…	GO:0005622~intracellular,GO:0043229~intracellular organelle,GO:0043231~intracellular membrane-bounded organelle,GO:0044424~intracellular part,	GO:0003677~DNA binding,GO:0043169~cation binding,
332801010	ZNF860,		Yes			zinc finger protein 860	Homo sapiens	3p23,	GO:0006139~nucleobase, nucleoside, nucleotide and nucleic acid metabolic process,GO:0009059~macromolecule biosynthetic process,GO:0009889~regulation of biosynthetic process,GO:0010467~gene expression,GO:0019222~regulation of metabolic process,GO:0031323~regulation of cellular metabolic process,GO:0034641~cellular nitrogen compound metabolic process,GO:0044249~cellular biosynthetic process,GO:0044…	GO:0005622~intracellular,GO:0043229~intracellular organelle,GO:0043231~intracellular membrane-bounded organelle,GO:0044424~intracellular part,	GO:0003677~DNA binding,GO:0043169~cation binding,
296278253			N/A			PET112-like (yeast)	Homo sapiens	4q27-q28,	GO:0005622~intracellular,GO:0005737~cytoplasm,GO:0043229~intracellular organelle,GO:0043231~intracellular membrane-bounded organelle,GO:0044424~intracellular part,GO:0044444~cytoplasmic part,	GO:0001883~purine nucleoside binding,GO:0008135~translation factor activity, nucleic acid binding,GO:0016879~ligase activity, forming carbon-nitrogen bonds,GO:0017076~purine nucleotide binding,GO:0032553~ribonucleotide binding,	PET112L,
341914186			N/A			similar to hCG1778601	Homo sapiens	19q13.41,			LOC388559,
